# Supplementary material
Source: MDPI journal article supplement (https://www.mdpi.com/2624-8611/6/1/7)
Supplement: s1 [file s1]

## **Appendix: Online Supplement**

### **List of Acronyms**

EFA = Exploratory Factor Analysis  
CFA = confirmatory factor analysis  
SEM = structural equation modeling  
ESEM = exploratory structural equation modeling  
BSEM = Bayesian structural equation modeling  
ML= maximum likelihood  
WLSMV = Weighted Least Squares with Mean and Variance Adjusted  
Bayes- NIP = Bayesian Non-informative Priors  
Bayes- IP = Bayesian Informative Priors  
CFI = Comparative Fit Index  
TLI = Tucker-Lewis Index  
RMSEA = Root Mean Square Error of Approximation  
BCFI = Bayesian Comparative Fit Index  
BTLI = Bayesian Tucker-Lewis Index  
BRMSEA = Bayesian Root Mean Square Error of Approximation  
PPP = Posterior Predictive P-Value  
PPPP = Prior Posterior Predictive P-Value  
BIC = Bayesian Information Criterion  
DIC = Deviance information criterion

## Sample Mplus Code

```
TITLE: CFA_IPIP120_agreeableness 6 Correlated ml
DATA: FILE = " IPIP120_USA_agree_mplus.csv";
VARIABLE:
NAMES = I4 I34 I64 I94 I9 I39 I69 I99 I14 I44 I74 I104
I19 I49 I79 I109 I24 I54 I84 I114 I29 I59 I89 I119 ;
USEVARIABLES = I4 I34 I64 I94 I9 I39 I69 I99 I14 I44 I74 I104
I19 I49 I79 I109 I24 I54 I84 I114 I29 I59 I89 I119 ;
MISSING = ALL(999);
ANALYSIS:
ESTIMATOR = ML;

MODEL:
f1 BY I4 I34 I64 I94;
f2 BY I9 I39 I69 I99;
f3 BY I14 I44 I74 I104;
f4 BY I19 I49 I79 I109;
f5 BY I24 I54 I84 I114;
f6 BY I29 I59 I89 I119 ;

OUTPUT:
STDYX RESIDUAL TECH4 MODINDICES(ALL);
```

```
TITLE: CFA IPIP120_agreeableness Bifactor ml
DATA: FILE = "IPIP120_USA_agree_mplus.csv";
VARIABLE:
NAMES = I4 I34 I64 I94 I9 I39 I69 I99 I14 I44 I74 I104
I19 I49 I79 I109 I24 I54 I84 I114 I29 I59 I89 I119 ;
USEVARIABLES = I4 I34 I64 I94 I9 I39 I69 I99 I14 I44 I74 I104
I19 I49 I79 I109 I24 I54 I84 I114 I29 I59 I89 I119 ;
MISSING = ALL(999);
ANALYSIS:
ESTIMATOR = ml;
TYPE = general;

MODEL:
fg BY I4 I34 I64 I94 I9 I39 I69 I99 I14 I44 I74 I104
I19 I49 I79 I109 I24 I54 I84 I114 I29 I59 I89 I119 ;
f1 BY I4 I34 I64 I94 ;
f2 BY I9 I39 I69 I99 ;
f3 BY I14 I44 I74 I104 ;
f4 BY I19 I49 I79 I109 ;
f5 BY I24 I54 I84 I114 ;
f6 BY I29 I59 I89 I119 ;
fg WITH f1@0;
fg WITH f2@0;
fg WITH f3@0;
fg WITH f4@0;
```

fg WITH f5@0;  
fg WITH f6@0;  
f1 WITH f2@0;  
f1 WITH f3@0;  
f1 WITH f4@0;  
f1 WITH f5@0;  
f1 WITH f6@0;  
f2 WITH f3@0;  
f2 WITH f4@0;  
f2 WITH f5@0;  
f2 WITH f6@0;  
f3 WITH f4@0;  
f3 WITH f5@0;  
f3 WITH f6@0;  
f4 WITH f5@0;  
f4 WITH f6@0;  
f5 WITH f6@0;

OUTPUT:

SAMPSTAT STANDARDIZED RESIDUAL TECH4 MODINDICES(ALL);

**TITLE: CFA IPIP120\_agreeableness Hierarchical\_ml**  
 DATA: FILE = "IPIP120\_USA\_agree\_mplus.csv";  
 VARIABLE:  
 NAMES = I4 I34 I64 I94 I9 I39 I69 I99 I14 I44 I74 I104  
 I19 I49 I79 I109 I24 I54 I84 I114 I29 I59 I89 I119 ;  
 USEVARIABLES = I4 I34 I64 I94 I9 I39 I69 I99 I14 I44 I74 I104  
 I19 I49 I79 I109 I24 I54 I84 I114 I29 I59 I89 I119 ;  
 MISSING = ALL(999);  
 ANALYSIS:  
 ESTIMATOR = ML;  
  
 MODEL:  
 f1 BY I4 I34 I64 I94;  
 f2 BY I9 I39 I69 I99;  
 f3 BY I14 I44 I74 I104;  
 f4 BY I19 I49 I79 I109;  
 f5 BY I24 I54 I84 I114;  
 f6 BY I29 I59 I89 I119 ;  
 fg BY f1 f2 f3 f4 f5 f6 ;  
 OUTPUT:  
 stdyx RESIDUAL TECH4 MODINDICES(ALL);

**TITLE: ESEM\_IPIP120\_agreeableness 6 Correlated ml**  
 DATA: FILE = "IPIP120\_USA\_agree\_mplus.csv";  
 VARIABLE:  
 NAMES = I4 I34 I64 I94 I9 I39 I69 I99 I14 I44 I74 I104  
 I19 I49 I79 I109 I24 I54 I84 I114 I29 I59 I89 I119 ;  
 USEVARIABLES = I4 I34 I64 I94 I9 I39 I69 I99 I14 I44 I74 I104  
 I19 I49 I79 I109 I24 I54 I84 I114 I29 I59 I89 I119 ;

```
MISSING = ALL(999);
ANALYSIS:
ESTIMATOR = ml;
TYPE = general;
ROTATION = Target;
```

MODEL:

```
f1 BY I4 I34 I64 I94 I9~0 I39~0 I69~0 I99~0 I14~0 I44~0 I74~0
I104~0 I19~0 I49~0 I79~0 I109~0 I24~0 I54~0 I84~0
I114~0 I29~0 I59~0 I89~0 I119~0 (*1);
f2 BY I9 I39 I69 I99 I4~0 I34~0 I64~0 I94~0
I14~0 I44~0 I74~0 I104~0 I19~0 I49~0 I79~0 I109~0 I24~0 I54~0
I84~0 I114~0 I29~0 I59~0 I89~0 I119~0 (*1);
f3 BY I14 I44 I74 I104 I4~0 I34~0 I64~0 I94~0 I9~0 I39~0 I69~0 I99~0
I19~0 I49~0 I79~0 I109~0 I24~0 I54~0 I84~0
I114~0 I29~0 I59~0 I89~0 I119~0 (*1);
f4 BY I19 I49 I79 I109 I4~0 I34~0 I64~0 I94~0 I9~0 I39~0 I69~0 I99~0
I14~0 I44~0 I74~0 I104~0 I24~0 I54~0 I84~0
I114~0 I29~0 I59~0 I89~0 I119~0 (*1);
f5 BY I24 I54 I84 I114 I4~0 I34~0 I64~0 I94~0 I9~0 I39~0 I69~0 I99~0
I14~0 I44~0 I74~0
I104~0 I19~0 I49~0 I79~0 I109~0 I29~0 I59~0 I89~0 I119~0 (*1);
f6 BY I29 I59 I89 I119 I4~0 I34~0 I64~0 I94~0 I9~0 I39~0 I69~0 I99~0
I14~0 I44~0 I74~0
I104~0 I19~0 I49~0 I79~0 I109~0 I24~0 I54~0 I84~0
I114~0 (*1);
```

OUTPUT:

```
SAMPSTAT STANDARDIZED RESIDUAL CINTERVAL TECH1 TECH2 TECH3 TECH4
MODINDICES(ALL);
```

**TITLE: ESEM\_IPIP120\_agreeableness Bifactor ml**

DATA: FILE = "IPIP120\_USA\_agree\_mplus.csv";

VARIABLE:

```
NAMES = I4 I34 I64 I94 I9 I39 I69 I99 I14 I44 I74 I104
I19 I49 I79 I109 I24 I54 I84 I114 I29 I59 I89 I119 ;
USEVARIABLES = I4 I34 I64 I94 I9 I39 I69 I99 I14 I44 I74 I104
I19 I49 I79 I109 I24 I54 I84 I114 I29 I59 I89 I119 ;
MISSING = ALL(999);
ANALYSIS:
ESTIMATOR = ml;
TYPE = general;
ROTATION = Target (orthogonal);
```

MODEL:

```
fg BY I4 I34 I64 I94 I9 I39 I69 I99 I14 I44 I74 I104
I19 I49 I79 I109 I24 I54 I84 I114 I29 I59 I89 I119 (*1);
f1 BY I4 I34 I64 I94 I9~0 I39~0 I69~0 I99~0 I14~0 I44~0 I74~0
I104~0 I19~0 I49~0 I79~0 I109~0 I24~0 I54~0 I84~0
I114~0 I29~0 I59~0 I89~0 I119~0 (*1);
f2 BY I9 I39 I69 I99 I4~0 I34~0 I64~0 I94~0
I14~0 I44~0 I74~0 I104~0 I19~0 I49~0 I79~0 I109~0 I24~0 I54~0
I84~0 I114~0 I29~0 I59~0 I89~0 I119~0 (*1);
f3 BY I14 I44 I74 I104 I4~0 I34~0 I64~0 I94~0 I9~0 I39~0 I69~0 I99~0
I19~0 I49~0 I79~0 I109~0 I24~0 I54~0 I84~0
I114~0 I29~0 I59~0 I89~0 I119~0 (*1);
f4 BY I19 I49 I79 I109 I4~0 I34~0 I64~0 I94~0 I9~0 I39~0 I69~0 I99~0
I14~0 I44~0 I74~0 I104~0 I24~0 I54~0 I84~0
I114~0 I29~0 I59~0 I89~0 I119~0 (*1);
f5 BY I24 I54 I84 I114 I4~0 I34~0 I64~0 I94~0 I9~0 I39~0 I69~0 I99~0
I14~0 I44~0 I74~0
I104~0 I19~0 I49~0 I79~0 I109~0 I29~0 I59~0 I89~0 I119~0 (*1);
f6 BY I29 I59 I89 I119 I4~0 I34~0 I64~0 I94~0 I9~0 I39~0 I69~0 I99~0
I14~0 I44~0 I74~0
I104~0 I19~0 I49~0 I79~0 I109~0 I24~0 I54~0 I84~0
I114~0 (*1);
SAMPSTAT STANDARDIZED RESIDUAL TECH4 MODINDICES(ALL);
```

**TITLE: ESEM\_IPIP120\_agreeableness Hierarchical Model\_ml**

DATA: FILE = "IPIP120\_USA\_agree\_mplus.csv";

VARIABLE:

```
NAMES = I4 I34 I64 I94 I9 I39 I69 I99 I14 I44 I74 I104
I19 I49 I79 I109 I24 I54 I84 I114 I29 I59 I89 I119 ;
USEVARIABLES = I4 I34 I64 I94 I9 I39 I69 I99 I14 I44 I74 I104
I19 I49 I79 I109 I24 I54 I84 I114 I29 I59 I89 I119 ;
MISSING = ALL(999);
ANALYSIS:
ESTIMATOR = ML;
```

MODEL:

```
f1 BY I4*0.906 ; f1 BY I34*0.599 ; f1 BY I64*0.869 ; f1 BY I94*0.870;
f1 BY I9*0.032; f1 BY I39*-0.021; f1 BY I69*0.019; f1 BY I99@-0.022;
f1 BY I14*0.080; f1 BY I44*0.046; f1 BY I74@-0.007; f1 BY I104*0.042;
f1 BY I19@0.021; f1 BY I49*0.058; f1 BY I79*0.038; f1 BY I109@0.086 ;
f1 BY I24*0.059; f1 BY I54*-0.017; f1 BY I84@-0.007; f1 BY I114@-0.061;
f1 BY I29*-0.002; f1 BY I59@-0.002 ; f1 BY I89*0.043; f1 BY I119@-0.022 ;
f2 BY I9*0.800 ; f2 BY I39*0.528; f2 BY I69*0.818; f2 BY I99*0.231;
```

f2 BY I4\*-0.005 ; f2 BY I34@0.001 ; f2 BY I64@-0.058 ; f2 BY I94\*0.050;  
 f2 BY I14\*0.059; f2 BY I44@0.003 ; f2 BY I74\*0.030; f2 BY I104@0.099;  
 f2 BY I19@-0.018; f2 BY I49\*-0.089; f2 BY I79\*0.134; f2 BY I109@0.177;  
 f2 BY I24\*0.337 ; f2 BY I54\*-0.101; f2 BY I84@-0.095; f2 BY I114@0.189;  
 f2 BY I29\*-0.053; f2 BY I59@-0.013; f2 BY I89\*-0.024; f2 BY I119@0.086 ;  
 f3 BY I14\*0.442; f3 BY I44\*0.523; f3 BY I74\*0.425 ; f3 BY I104\*0.479;  
 f3 BY I4@-0.012 ; f3 BY I34\*0.068 ; f3 BY I64\*-0.028 ; f3 BY I94\*-0.025;  
 f3 BY I9\* -0.048; f3 BY I39@0.017; f3 BY I69\*0.040 ; f3 BY I99\*0.123;  
 f3 BY I19\*-0.046; f3 BY I49\*-0.026; f3 BY I79\*0.060 ; f3 BY I109@0.010;  
 f3 BY I24\* 0.069; f3 BY I54\*-0.037; f3 BY I84@-0.015; f3 BY I114\*0.018 ;  
 f3 BY I29\*-0.217; f3 BY I59\* 0.140; f3 BY I89\* 0.510 ; f3 BY I119@0.107;  
 f4 BY I19\*0.696; f4 BY I49\*0.861 ; f4 BY I79\*0.666 ;f4 BY I109\*0.616 ;  
 f4 BY I4\* -0.039 ; f4 BY I34\* 0.027 ; f4 BY I64@0.000 ; f4 BY I94\*0.078;  
 f4 BY I9\* -0.067; f4 BY I39\*0.175; f4 BY I69@-0.049; f4 BY I99@0.255;  
 f4 BY I14\*-0.019; f4 BY I44\*-0.033; f4 BY I74\*0.180; f4 BY I104@0.003 ;  
 f4 BY I24\* -0.018 ; f4 BY I54\* -0.021; f4 BY I84@-0.008; f4 BY I114\*0.247;  
 f4 BY I29@0.002 ; f4 BY I59\*-0.017; f4 BY I89\* 0.037 ; f4 BY I119\*0.022;  
 f5 BY I24\*0.570; f5 BY I54\*1.004; f5 BY I84\* 1.096; f5 BY I114\* 0.250;  
 f5 BY I4@-0.004 ; f5 BY I34\*-0.022 ; f5 BY I64\*0.031 ; f5 BY I94\*-0.028 ;  
 f5 BY I9\* 0.068; f5 BY I39@-0.024; f5 BY I69\* 0.025; f5 BY I99@-0.033;  
 f5 BY I14@-0.004 ; f5 BY I44\*0.019; f5 BY I74\* 0.007; f5 BY I104\*0.018;  
 f5 BY I19\*0.129 ; f5 BY I49\* -0.035; f5 BY I79@0.013; f5 BY I109\*0.023;  
 f5 BY I29@-0.001; f5 BY I59\*0.019; f5 BY I89\*0.057; f5 BY I119@-0.033;  
 f6 BY I29\*1.051; f6 BY I59\*0.601; f6 BY I89\*0.147; f6 BY I119\* 0.519;  
 f6 BY I4\* -0.037 ; f6 BY I34\*0.071 ; f6 BY I64@-0.001 ; f6 BY I94\*-0.045;  
 f6 BY I9\*0.017; f6 BY I39\* 0.016 ; f6 BY I69\*0.014; f6 BY I99@-0.004;  
 f6 BY I14\* 0.105; f6 BY I44\*0.125; f6 BY I74\* 0.111; f6 BY I104@-0.013;  
 f6 BY I19\*0.039; f6 BY I49@-0.035; f6 BY I79\*0.058; f6 BY I109\*0.055;  
 f6 BY I24\*0.054; f6 BY I54\*-0.006; f6 BY I84\*-0.024; f6 BY I114@-0.002;  
 f1-f6@1;

fg BY f1 f2 f3 f4 f5 f6 ;

OUTPUT:

SAMPSTAT STANDARDIZED RESIDUAL CINTERVAL TECH1 TECH2 TECH3 TECH4  
 MODINDICES(ALL)

**TITLE: Bayesian SEM IPIP120\_agreeableness bifactor\_Informative priors\_cross loadings**

DATA: FILE = " IPIP120\_USA\_agree\_mplus.csv";

VARIABLE:

NAMES = I4 I34 I64 I94 I9 I39 I69 I99 I14 I44 I74 I104  
 I19 I49 I79 I109 I24 I54 I84 I114 I29 I59 I89 I119 ;

USEVARIABLES = I4 I34 I64 I94 I9 I39 I69 I99 I14 I44 I74 I104  
 I19 I49 I79 I109 I24 I54 I84 I114 I29 I59 I89 I119 ;

MISSING = ALL(999);

ANALYSIS:

ESTIMATOR = BAYES;

fbiterations = 10000 (2000) ;

processors = 2;

MODEL:

f1 BY I4 I34 I64 I94 ;  
f1 BY I9@0 I39@0 I69@0 I99@0 ;  
f1 BY I14@0 I44@0 I74@0 I104@0 ;  
f1 BY I19@0 I49@0 I79@0 I109@0 ;  
f1 BY I24@0 I54@0 I84@0 I114@0 ;  
f1 BY I29@0 I59@0 I89@0 I119@0 ;

f2 BY I9 I39 I69 I99 ;  
f2 BY I4@0 I34@0 I64@0 I94@0 ;  
f2 BY I14@0 I44@0 I74@0 I104@0 ;  
f2 BY I19@0 I49@0 I79@0 I109@0 ;  
f2 BY I24@0 I54@0 I84@0 I114@0 ;  
f2 BY I29@0 I59@0 I89@0 I119@0 ;

f3 BY I14 I44 I74 I104  
I9@0 I39@0 I69@0 I99@0  
I4@0 I34@0 I64@0 I94@0  
I19@0 I49@0 I79@0 I109@0  
I24@0 I54@0 I84@0 I114@0  
I29@0 I59@0 I89@0 I119@0 ;

f4 BY I19 I49 I79 I109  
I4@0 I34@0 I64@0 I94@0  
I9@0 I39@0 I69@0 I99@0  
I14@0 I44@0 I74@0 I104@0  
I24@0 I54@0 I84@0 I114@0  
I29@0 I59@0 I89@0 I119@0 ;

f5 BY I24 I54 I84 I114  
I19@0 I49@0 I79@0 I109@0  
I4@0 I34@0 I64@0 I94@0  
I9@0 I39@0 I69@0 I99@0  
I14@0 I44@0 I74@0 I104@0  
I29@0 I59@0 I89@0 I119@0 ;

f6 BY I29 I59 I89 I119  
I24@0 I54@0 I84@0 I114@0  
I19@0 I49@0 I79@0 I109@0  
I4@0 I34@0 I64@0 I94@0  
I9@0 I39@0 I69@0 I99@0  
I14@0 I44@0 I74@0 I104@0 ;

fg BY I4 I34 I64 I94 I9 I39 I69 I99 I14 I44 I74 I104  
I19 I49 I79 I109 I24 I54 I84 I114 I29 I59 I89 I119 ;

fg WITH f1@0;  
fg WITH f2@0;  
fg WITH f3@0;  
fg WITH f4@0;  
fg WITH f5@0;  
fg WITH f6@0;  
f1 WITH f2@0;



f1 WITH f3@0;  
 f1 WITH f4@0;  
 f1 WITH f5@0;  
 f1 WITH f6@0;  
 f2 WITH f3@0;  
 f2 WITH f4@0;  
 f2 WITH f5@0;  
 f2 WITH f6@0;  
 f3 WITH f4@0;  
 f3 WITH f5@0;  
 f3 WITH f6@0;  
 f4 WITH f5@0;  
 f4 WITH f6@0;  
 f5 WITH f6@0;  
 f1 BY I9 I39 I69 I99 (a1-a4);  
 f1 BY I14 I44 I74 I104 (a5-a8);  
 f1 BY I19 I49 I79 I109 (a9-a12);  
 f1 BY I24 I54 I84 I114 (a13-a16);  
 f1 BY I29 I59 I89 I119 (a17-a20);  
  
 f2 BY I4 I34 I64 I94 (b1-b4);  
 f2 BY I14 I44 I74 I104(b5-b8);  
 f2 BY I19 I49 I79 I109(b9-b12);  
 f2 BY I24 I54 I84 I114 (b13-b16);  
 f2 BY I29 I59 I89 I119 (b17-b20);  
  
 f3 BY I9 I39 I69 I99 (c1-c4);  
 f3 BY I4 I34 I64 I94 (c5-c8);  
 f3 BY I19 I49 I79 I109(c9-c12);  
 f3 BY I24 I54 I84 I114 (c13-c16);  
 f3 BY I29 I59 I89 I119 (c17-c20);  
  
 f4 BY I4 I34 I64 I94 (d1-d4)  
 I9 I39 I69 I99 (d5-d8)  
 I14 I44 I74 I104(d9-d12)  
 I24 I54 I84 I114 (d13-d16)  
 I29 I59 I89 I119 (d17-d20);  
  
 f5 BY I19 I49 I79 I109 (e1-e4)  
 I4 I34@0 I64@0 I94 (e5-e8)  
 I9 I39 I69 I99 (e9-e12)  
 I14 I44 I74 I104(e13-e16)  
 I29 I59 I89 I119 (e17-e20);  
  
 f6 BY I24 I54 I84 I114 (f1-f4)  
 I19 I49 I79 I109 (f5-f8)  
 I4 I34 I64 I94 (f9-f12)  
 I9 I39 I69 I99 (f13-f16)  
 I14 I44 I74 I104(f17-f20);  
 model priors:  
 a1-a20 ~ N(0,0.01);  
 b1-b20 ~ N(0,0.01);

```

c1-c20 ~ N(0,0.01);
d1-d20 ~ N(0,0.01);
e1-e20 ~ N(0,0.01);
f1-f20 ~ N(0,0.01);

```

OUTPUT:

STANDARDIZED RESIDUAL CINTERVAL TECH1 TECH8 stdy svalues;

**TITLE: Bayesian SEM IPIP120\_agreeableness Hierarchical Model with informative\_priors\_cross loadings**

DATA: FILE = "IPIP120\_USA\_agree\_mplus.csv";

VARIABLE:

NAMES = I4 I34 I64 I94 I9 I39 I69 I99 I14 I44 I74 I104  
I19 I49 I79 I109 I24 I54 I84 I114 I29 I59 I89 I119 ;

USEVARIABLES = I4 I34 I64 I94 I9 I39 I69 I99 I14 I44 I74 I104  
I19 I49 I79 I109 I24 I54 I84 I114 I29 I59 I89 I119 ;  
MISSING = ALL(999);

ANALYSIS:

ESTIMATOR = BAYES;

fbiterations = 10000 (2000) ;

processors = 2;

MODEL:

```

f1 BY I4 I34 I64 I94 ;
f1 BY I9@0 I39@0 I69@0 I99@0 ;
f1 BY I14@0 I44@0 I74@0 I104@0 ;
f1 BY I19@0 I49@0 I79@0 I109@0;
f1 BY I24@0 I54@0 I84@0 I114@0 ;
f1 BY I29@0 I59@0 I89@0 I119@0 ;

```

```

f2 BY I9 I39 I69 I99;
f2 BY I4@0 I34@0 I64@0 I94@0 ;
f2 BY I14@0 I44@0 I74@0 I104@0;
f2 BY I19@0 I49@0 I79@0 I109@0;
f2 BY I24@0 I54@0 I84@0 I114@0 ;
f2 BY I29@0 I59@0 I89@0 I119@0 ;

```

```

f3 BY I14 I44 I74 I104
      I9@0 I39@0 I69@0 I99@0
      I4@0 I34@0 I64@0 I94@0
      I19@0 I49@0 I79@0 I109@0
      I24@0 I54@0 I84@0 I114@0
      I29@0 I59@0 I89@0 I119@0 ;

```

```

f4 BY I19 I49 I79 I109
      I4@0 I34@0 I64@0 I94@0
      I9@0 I39@0 I69@0 I99@0
      I14@0 I44@0 I74@0 I104@0
      I24@0 I54@0 I84@0 I114@0
      I29@0 I59@0 I89@0 I119@0 ;

```

f5 BY I24 I54 I84 I114  
I19@0 I49@0 I79@0 I109@0  
I4@0 I34@0 I64@0 I94@0  
I9@0 I39@0 I69@0 I99@0  
I14@0 I44@0 I74@0 I104@0  
I29@0 I59@0 I89@0 I119@0 ;

f6 BY I29 I59 I89 I119  
I24@0 I54@0 I84@0 I114@0  
I19@0 I49@0 I79@0 I109@0  
I4@0 I34@0 I64@0 I94@0  
I9@0 I39@0 I69@0 I99@0  
I14@0 I44@0 I74@0 I104@0;

fg BY f1 f2 f3 f4 f5 f6 ;

f1 BY I9 I39 I69 I99 (a1-a4);  
f1 BY I14 I44 I74 I104 (a5-a8);  
f1 BY I19 I49 I79 I109 (a9-a12);  
f1 BY I24 I54 I84 I114 (a13-a16);  
f1 BY I29 I59 I89 I119 (a17-a20);

f2 BY I4 I34 I64 I94 (b1-b4);  
f2 BY I14 I44 I74 I104(b5-b8);  
f2 BY I19 I49 I79 I109(b9-b12);  
f2 BY I24 I54 I84 I114 (b13-b16);  
f2 BY I29 I59 I89 I119 (b17-b20);

f3 BY I9 I39 I69 I99 (c1-c4);  
f3 BY I4 I34 I64 I94 (c5-c8);  
f3 BY I19 I49 I79 I109(c9-c12);  
f3 BY I24 I54 I84 I114 (c13-c16);  
f3 BY I29 I59 I89 I119 (c17-c20);

f4 BY I4 I34 I64 I94 (d1-d4)  
I9 I39 I69 I99 (d5-d8)  
I14 I44 I74 I104(d9-d12)  
I24 I54 I84 I114 (d13-d16)  
I29 I59 I89 I119 (d17-d20);

f5 BY I19 I49 I79 I109 (e1-e4)  
I4 I34@0 I64@0 I94 (e5-e8)  
I9 I39 I69 I99 (e9-e12)  
I14 I44 I74 I104(e13-e16)  
I29 I59 I89 I119 (e17-e20);

f6 BY I24 I54 I84 I114 (f1-f4)  
I19 I49 I79 I109 (f5-f8)  
I4 I34 I64 I94 (f9-f12)  
I9 I39 I69 I99 (f13-f16)  
I14 I44 I74 I104(f17-f20);

model priors:

a1-a20 ~ N(0,0.01);

b1-b20 ~ N(0,0.01);

c1-c20 ~ N(0,0.01);

d1-d20 ~ N(0,0.01);

e1-e20 ~ N(0,0.01);

f1-f20 ~ N(0,0.01);

OUTPUT:

STANDARDIZED RESIDUAL CINTERVAL TECH1 TECH8 stdy svalues;
